# Supplementary material
Source: MDPI journal article supplement (https://www.mdpi.com/2227-7102/13/12/1226)
Supplement: s1 [file s1]

Archive with 2 entries (2 files):
- S1 Table - copia.pdf
- S2 - copia.pdf
