# Supplementary material
Source: MDPI journal article supplement (https://www.mdpi.com/2227-7102/13/12/1226)
Supplement: s1 [file s1]

## S2: STANDARDS FOR ASSESSING THE QUALITY OF ARTICLES

Item 1: Provide in the abstract an informative and balanced summary of what was done and what was found.

Item 2: State-specific objectives, including any prespecified hypotheses.

Item 3: Give the eligibility criteria and the sources and methods of selection of participants.

Item 4: For each variable of interest, give sources of data and details of methods of assessment (measurement). Describe comparability of assessment methods if there is more than one group.

Item 5: Explain how quantitative variables were handled in the analyses. If applicable, describe which groupings were chosen and why.

Item 6: Give characteristics of study participants.

Item 7: Summarize key results with reference to study objectives.

Item 8: Discuss limitations of the study, considering sources of potential bias or imprecision. Discuss both direction and magnitude of any potential bias.

Item 9: Give a cautious overall interpretation of results considering objectives, limitations, multiplicity of analyses, results from similar studies, and other relevant evidence.

Item 10: Give the source of funding and the role of the funders for the present study and, if applicable, for the original study on which the present article is based.
